# Supplementary material for: Therapeutic and Prophylactic Antitumor Activity of an Oral Inhibitor of Fucosylation in Spontaneous Mammary Cancers
Source: Oxford University Press journal article supplement (doi:10.1158/1535-7163.mct-19-0500), 2020-03-12
Supplement: 15357163mct190500-sup-222111_3_supp_6102431_q5wpzp.docx [file 15357163mct190500-sup-222111_3_supp_6102431_q5wpzp.docx]

**Supplemental Figure 8.** Mean ± SEM of peripheral cytokines detected in terminal sera collected from untreated (shaded) and 2FF-treated (unshaded) TgMMTV-neu mice. N=6 to 8 per group, *p<0.05.
