# Supplementary material for: Therapeutic and Prophylactic Antitumor Activity of an Oral Inhibitor of Fucosylation in Spontaneous Mammary Cancers
Source: Oxford University Press journal article supplement (doi:10.1158/1535-7163.mct-19-0500), 2020-03-12
Supplement: 15357163mct190500-sup-222111_3_supp_6102453_q5wpzp.docx [file 15357163mct190500-sup-222111_3_supp_6102453_q5wpzp.docx]

**Supplemental Figure 3.** Shown is the effect of 2FF treatment on (A) Amount of IgG (Mean ± SEM) isolated from 75uL of sera collected, and (B) AAL lectin-based measurement of fucosylation (Mean ± SEM) of these samples from untreated (circle) or 2FF-treated (square) TgMMTV-neu mice (n=5 each).
