# Supplementary material for: Therapeutic and Prophylactic Antitumor Activity of an Oral Inhibitor of Fucosylation in Spontaneous Mammary Cancers
Source: Oxford University Press journal article supplement (doi:10.1158/1535-7163.mct-19-0500), 2020-03-12
Supplement: 15357163mct190500-sup-222111_3_supp_6102455_q5wpzp.docx [file 15357163mct190500-sup-222111_3_supp_6102455_q5wpzp.docx]

**Supplemental Figure 5.** Effect of 2FF-treatment on (A) Tumor volume (Mean ± SEM) over days since implant for mice treated with IgG2b (open circle), anti-CD8 (diamond), 20mM 2FF+IgG2b (closed circle), or 20mM 2FF+anti-CD8 (triangle), n=5 per group; and (B) Tumor volume (Mean ± SEM) over days since implant for mice treated with IgG2b (open circle), anti-NK (diamond), 20mM 2FF+IgG2b (closed circle), or 20mM 2FF+anti-NK (triangle), n=5 per group ****p<0.0001.
